# Supplementary material
Source: publisher figshare collection journal article supplement (https://acs.figshare.com/ndownloader/files/3775237)
Supplement: Supplementary file 1 [file 3775237]

**Supporting Information For:**

**Record High Single-Ion Magnetic Moments through  $4f^n5d^1$   
Electron Configurations in the Divalent Lanthanide Complexes  
 $[(C_5H_4SiMe_3)_3Ln]^-$**

Katie R. Meihaus,<sup>†</sup> Megan E. Fieser,<sup>‡</sup> Jordan F. Corbey,<sup>‡</sup> William J. Evans,<sup>‡,\*</sup> and Jeffrey R.  
Long<sup>†,§,\*</sup>

<sup>†</sup>*Department of Chemistry, University of California, Berkeley, California 94720*

<sup>‡</sup>*Department of Chemistry, University of California, Irvine, California 92697*

<sup>§</sup>*Materials Science Division, Lawrence Berkeley National Laboratory, Berkeley, California  
94720*

*Journal of the American Chemical Society*

## Table of Contents

Page S3 – Figure S1, Plot of the magnetic susceptibility times temperature ( $\chi_M T$ ) versus  $T$  for the stable trivalent lanthanides, cerium through ytterbium.

Page S4 – Figure S2, Plot of  $\chi_M T$  versus  $T$  for  $\text{Cp}'_3\text{Sm}$  /  $[\text{K}(\text{crypt-222})][\text{Cp}'_3\text{Sm}]$  and  $\text{Cp}'_3\text{Tm}$  /  $[\text{K}(\text{crypt-222})][\text{Cp}'_3\text{Tm}]$ .

Page S5 – Figure S3, Magnetization versus field curves for  $[\text{K}(2.2.2\text{-cryptand})][\text{Cp}'_3\text{Gd}]$ .

Page S6 – Figure S4, Plot of  $\chi_M T$  versus  $T$  for  $[\text{K}(\text{crypt-222})][\text{Cp}'_3\text{Y}]$  and  $[\text{K}(\text{crypt-222})][\text{Cp}'_3\text{La}]$ .

Page S7 – Figure S5, Plot of  $\chi_M T$  versus  $T$  for  $[\text{K}(2.2.2\text{-cryptand})][\text{Cp}'_3\text{Tb}]$  /  $\text{Cp}'_3\text{Tb}$  and  $\text{Cp}'_3\text{Er}$  /  $[\text{K}(2.2.2\text{-cryptand})][\text{Cp}'_3\text{Er}]$

Page S8 – Figure S6, Plot of  $\chi_M T$  versus  $T$  for  $\text{Cp}'_3\text{Ce}$  /  $[\text{K}(\text{crypt-222})][\text{Cp}'_3\text{Ce}]$  and  $\text{Cp}'_3\text{Pr}$  /  $[\text{K}(\text{crypt-222})][\text{Cp}'_3\text{Pr}]$ .

Page S9 – Figure S7, Variable-field  $\chi_M T$  versus  $T$  for  $[\text{K}(\text{crypt-222})][\text{Cp}'_3\text{Ce}]$  and  $[\text{K}(\text{crypt-222})][\text{Cp}'_3\text{Nd}]$ .

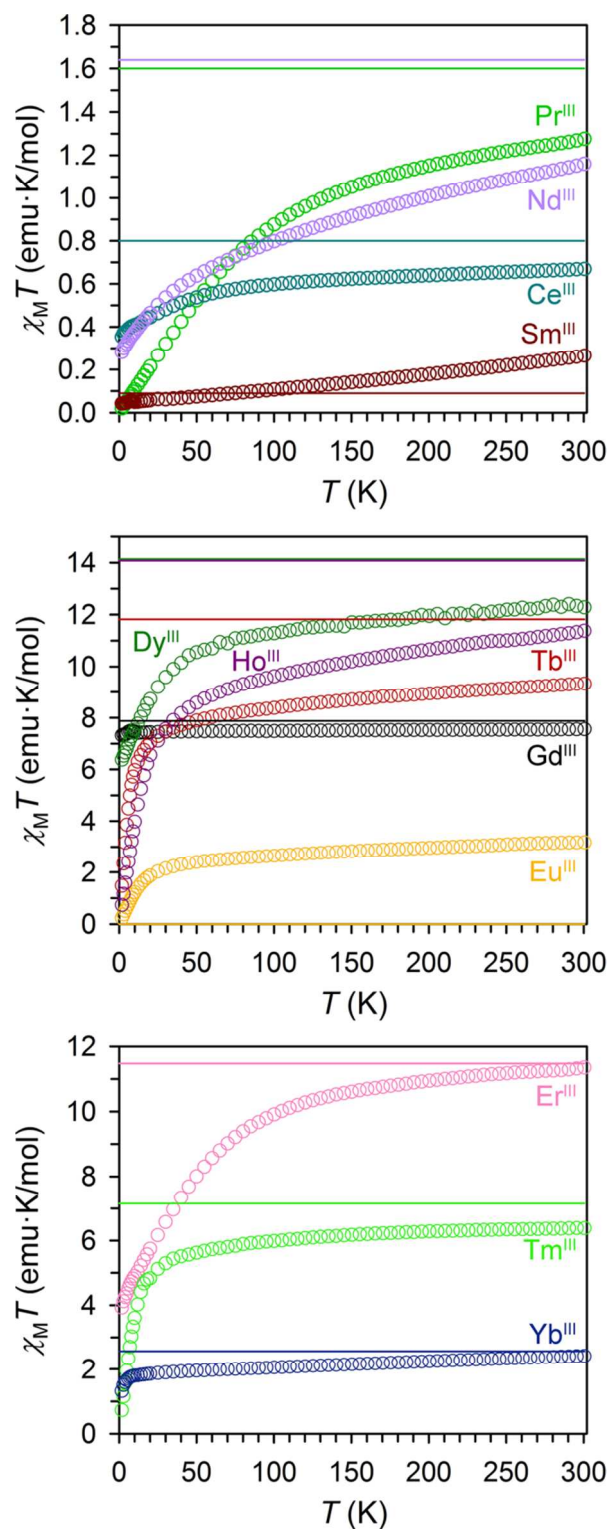

**Figure S1.** Plot of the magnetic susceptibility times temperature ( $\chi_M T$ ) versus temperature for the stable trivalent lanthanides, cerium through ytterbium. Colored circles correspond to experimental data and colored lines represent the theoretical room temperature  $\chi_M T$  value for each of the free trivalent lanthanides.

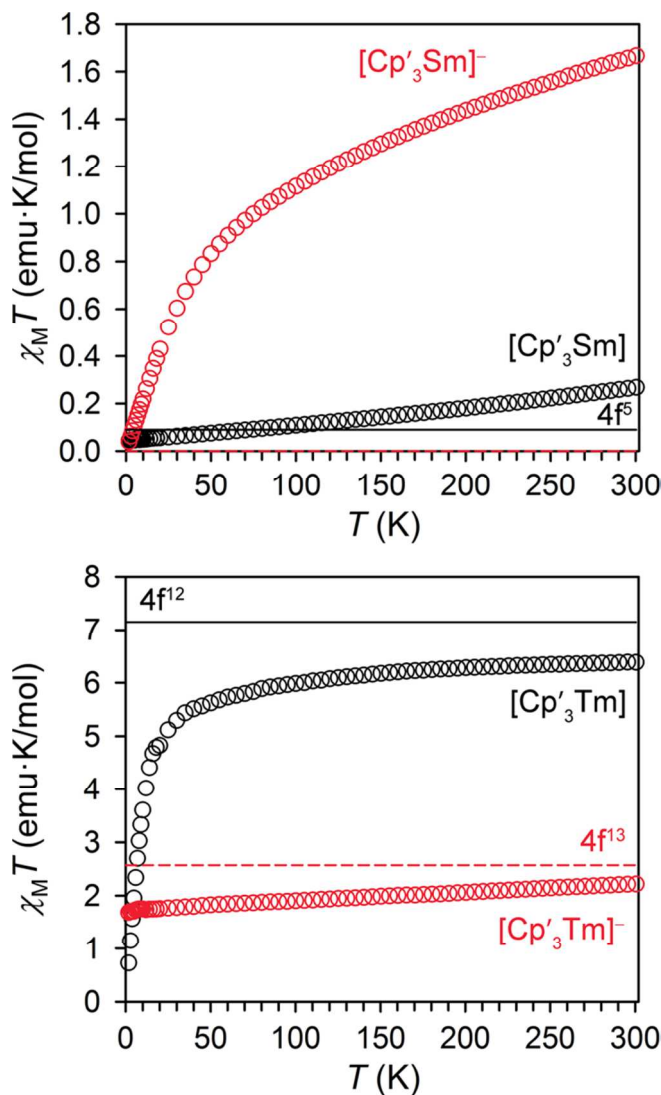

**Figure S2.** (Top) Plot of the magnetic susceptibility times temperature ( $\chi_M T$ ) versus temperature for  $\text{Cp}'_3\text{Sm}$  (black circles) and  $[\text{K}(\text{crypt-222})][\text{Cp}'_3\text{Sm}]$  (red circles) under an applied field of 0.1 T. Solid black and dashed pink lines represent the theoretical room temperature values for free  $\text{Sm}^{\text{III}}$  ( $4f^5$ ) and  $\text{Sm}^{\text{II}}$  ( $4f^7$ ), respectively. For  $[\text{K}(\text{crypt-222})][\text{Cp}'_3\text{Sm}]$  at  $T = 300$  K,  $\chi_M T$  is 1.66  $\text{emu} \cdot \text{K/mol}$ , larger than the theoretical value of 0  $\text{emu} \cdot \text{K/mol}$ , assuming only the ground state ( $S = 3$ ,  $L = 3$ ,  $J = 0$ ) is populated. However, the energy separation between ground and excited  $J$  for  $\text{Sm}^{\text{II}}$  and isoelectronic  $\text{Eu}^{\text{III}}$  is  $\sim 300 \text{ cm}^{-1}$ , thus due to population of excited  $J$  states, the room temperature moment is often larger than the theoretical prediction. (Bottom) Plot of the magnetic susceptibility times temperature ( $\chi_M T$ ) versus temperature for  $\text{Cp}'_3\text{Tm}$  (black circles) and  $[\text{K}(\text{crypt-222})][\text{Cp}'_3\text{Tm}]$  (red circles) under an applied field of 0.1 T. Solid black and dashed pink lines represent the theoretical room temperature values for free  $\text{Tm}^{\text{III}}$  ( $4f^{12}$ ) and  $\text{Tm}^{\text{II}}$  ( $4f^{13}$ ), respectively. The experimental room temperature  $\chi_M T$  values of 6.38  $\text{emu} \cdot \text{K/mol}$  and 2.22  $\text{emu} \cdot \text{K/mol}$  both closely approach the predicted values for free  $\text{Tm}^{\text{III}}$  (7.15  $\text{emu} \cdot \text{K/mol}$ ) and  $\text{Tm}^{\text{II}}$  (2.57  $\text{emu} \cdot \text{K/mol}$ ).

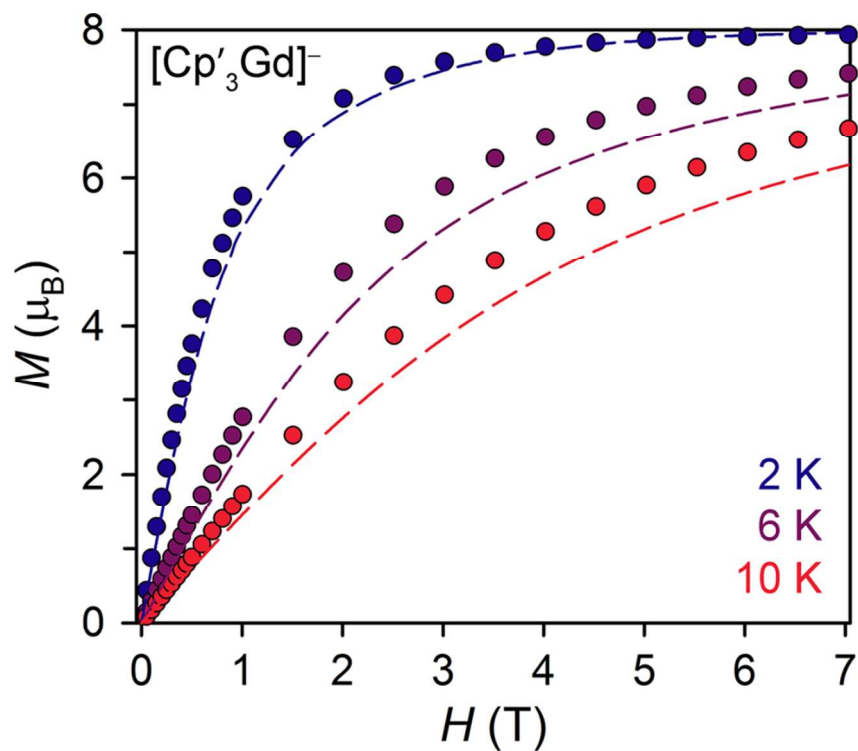

**Figure S3.** Variable temperature  $M(H)$  curves for  $[\text{K}(2.2.2\text{-cryptand})][\text{Cp}'_3\text{Gd}]$  collected from zero to 7 T. Data points are given by colored spheres and dashed lines represent the corresponding sum of an  $S = \frac{1}{2}$  and  $S = \frac{7}{2}$  Brillouin function.

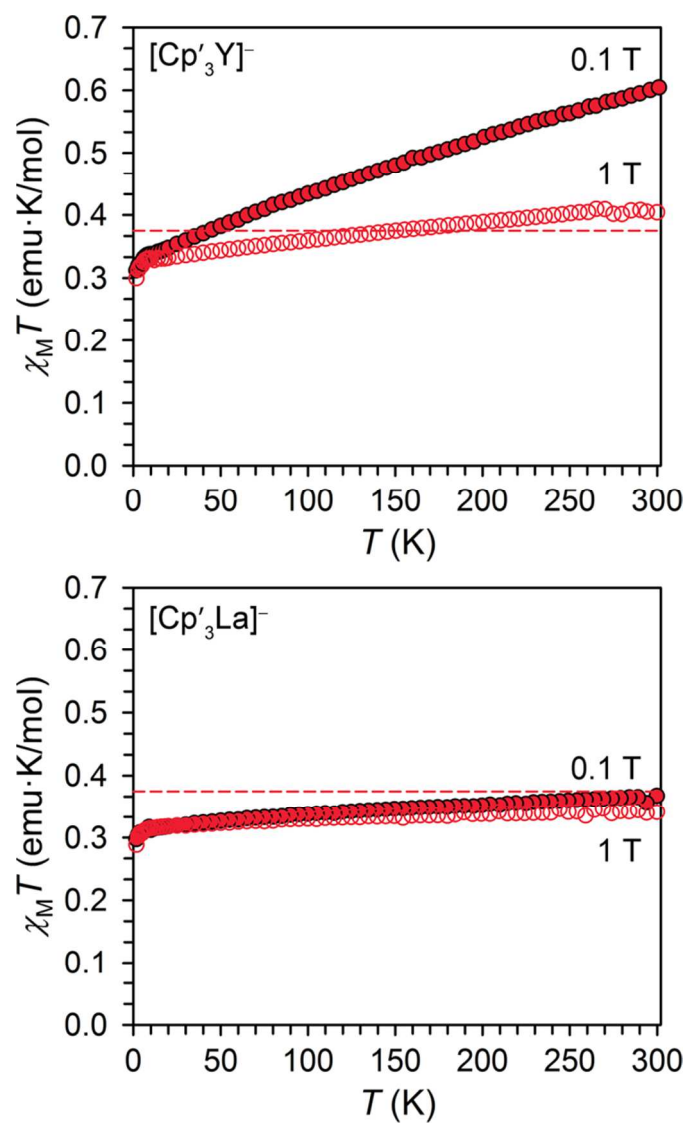

**Figure S4.** Plot of the magnetic susceptibility times temperature ( $\chi_M T$ ) versus temperature for [K(crypt-222)][Cp'<sub>3</sub>Y] (top) and [K(crypt-222)][Cp'<sub>3</sub>La] (bottom) under applied fields of 0.1 T (filled circles) and 1 T (empty circles). Solid dashed pink lines represent the theoretical room temperature  $\chi_M T$  values = 0.375 emu·K/mol for  $S = 1/2$ . The large slope and linear increase with temperature in the case of [K(crypt-222)][Cp'<sub>3</sub>Y] is indicative of temperature independent paramagnetism.

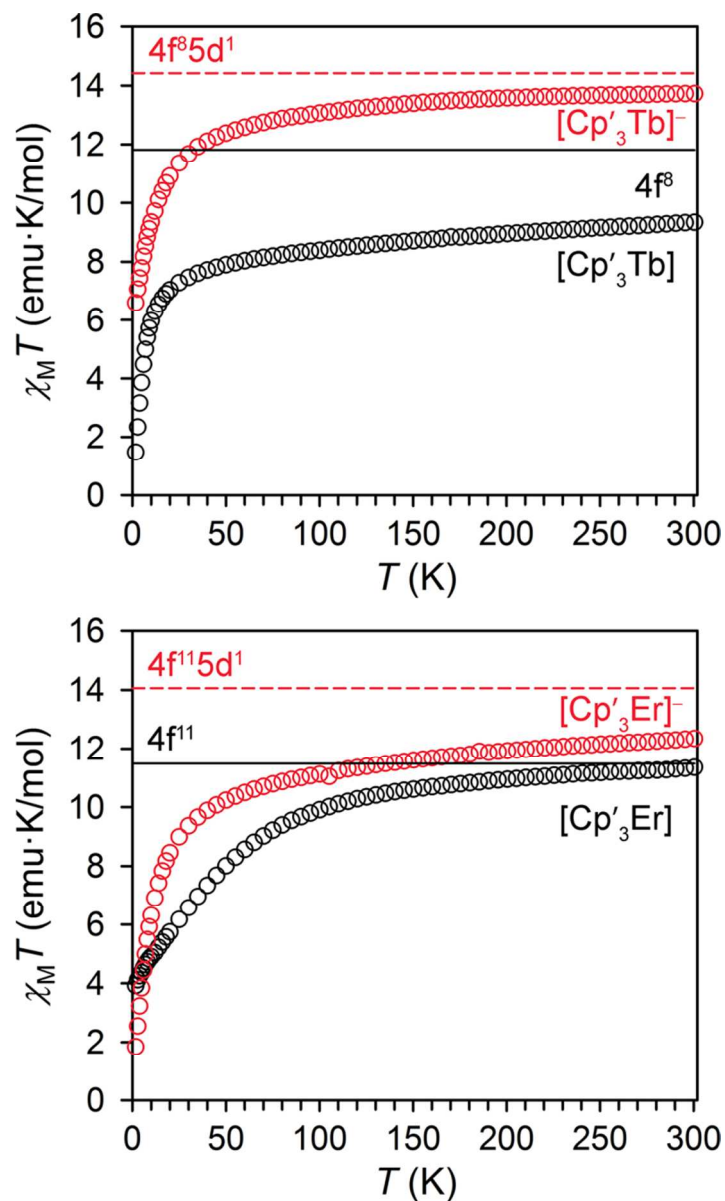

**Figure S5.** (Top) Plot of the static magnetic susceptibility times temperature ( $\chi_M T$ ) versus  $T$  collected at 0.1 T for  $\text{Cp}'_3\text{Tb}$  (black circles) and  $[K(2.2.2\text{-cryptand})][\text{Cp}'_3\text{Tb}]$  (red circles), with room temperature  $\chi_M T$  values of 13.73 emu·K/mol and 9.34 emu·K/mol, respectively. Dashed pink line and solid black line represent the theoretical  $\chi_M T$  values at 300 K for free  $\text{Tb}^{\text{II}}$  (14.42 emu·K/mol, coupled  $4f^8 5d^1$ ) and free  $\text{Tb}^{\text{III}}$  (11.82 emu·K/mol). (Bottom) Plot of the static magnetic susceptibility times temperature ( $\chi_M T$ ) versus  $T$  collected at 0.1 T for  $\text{Cp}'_3\text{Er}$  (black circles) and  $[K(2.2.2\text{-cryptand})][\text{Cp}'_3\text{Er}]$  (red circles), with room temperature  $\chi_M T$  values of 12.35 emu·K/mol and 11.35 emu·K/mol, respectively. Dashed pink line and solid black line represent the theoretical  $\chi_M T$  values at 300 K for free  $\text{Er}^{\text{II}}$  (14.06 emu·K/mol, coupled  $4f^{11} 5d^1$ ) and free  $\text{Er}^{\text{III}}$  (11.48 emu·K/mol).

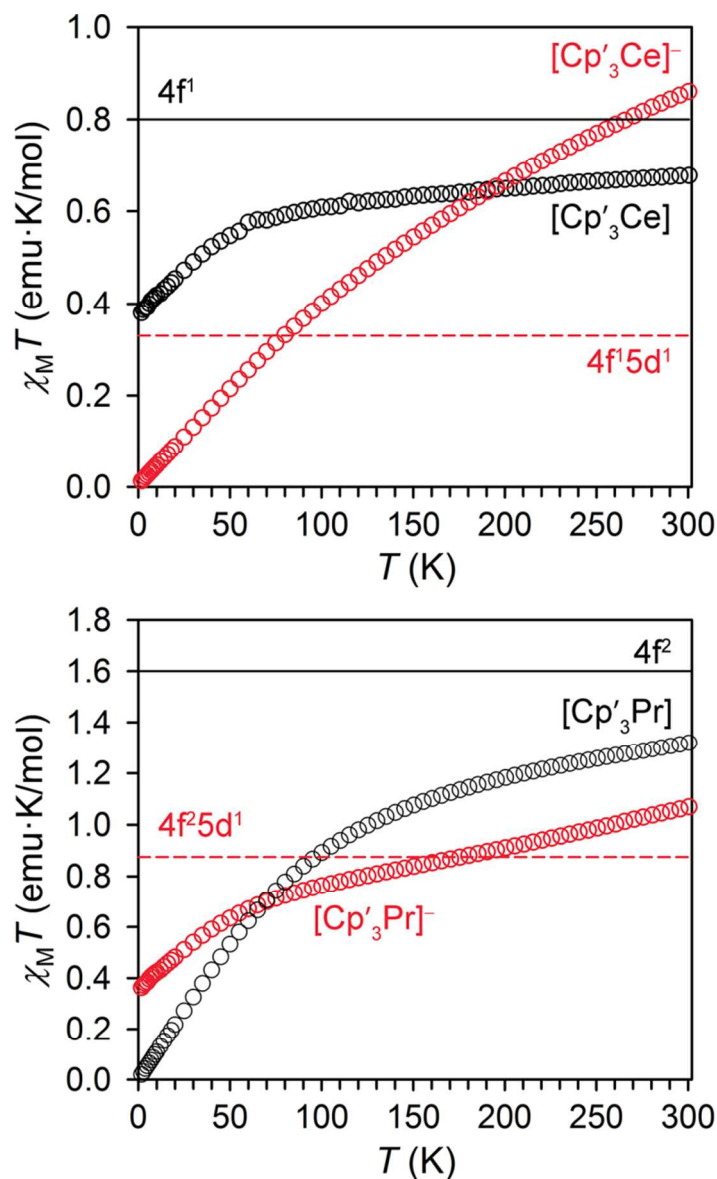

**Figure S6.** (Top) Plot of the magnetic susceptibility times temperature ( $\chi_M T$ ) versus temperature for  $\text{Cp}'_3\text{Ce}$  (black circles) and  $[\text{K}(\text{crypt-222})][\text{Cp}'_3\text{Ce}]$  (red circles) under an applied field of 0.1 T. Solid black and dashed pink lines represent the theoretical room temperature values for free  $\text{Ce}^{\text{III}}$  ( $4f^1$ ) and  $\text{Ce}^{\text{II}}$  (assuming  $4f^1 5d^1$ ), respectively. For  $[\text{K}(\text{crypt-222})][\text{Cp}'_3\text{Ce}]$  at  $T = 300$  K,  $\chi_M T$  is 0.86 emu·K/mol, larger than the theoretical value for the coupled  $4f^1 5d^1$  configuration (0.33 emu·K/mol), though smaller than the theoretical value for the  $4f^2$  and uncoupled  $4f^1 5d^1$  configurations (1.6 emu·K/mol and 1.18 emu·K/mol, respectively). (Bottom) Plot of the magnetic susceptibility times temperature ( $\chi_M T$ ) versus temperature for  $\text{Cp}'_3\text{Pr}$  (black circles) and  $[\text{K}(\text{crypt-222})][\text{Cp}'_3\text{Pr}]$  (red circles) under an applied field of 0.1 T. Solid black and dashed pink lines represent the theoretical room temperature values for free  $\text{Pr}^{\text{III}}$  ( $4f^2$ ) and  $\text{Pr}^{\text{II}}$  ( $4f^2 5d^1$  coupled), respectively. The room temperature  $\chi_M T$  value of 1.07 emu·K/mol for  $[\text{K}(\text{crypt-222})][\text{Cp}'_3\text{Pr}]$  falls in between the values for the  $4f^2$  and  $4f^2 5d^1$  configurations, similar to  $\text{Ce}^{\text{II}}$  and  $\text{Nd}^{\text{II}}$  as discussed in the main text.



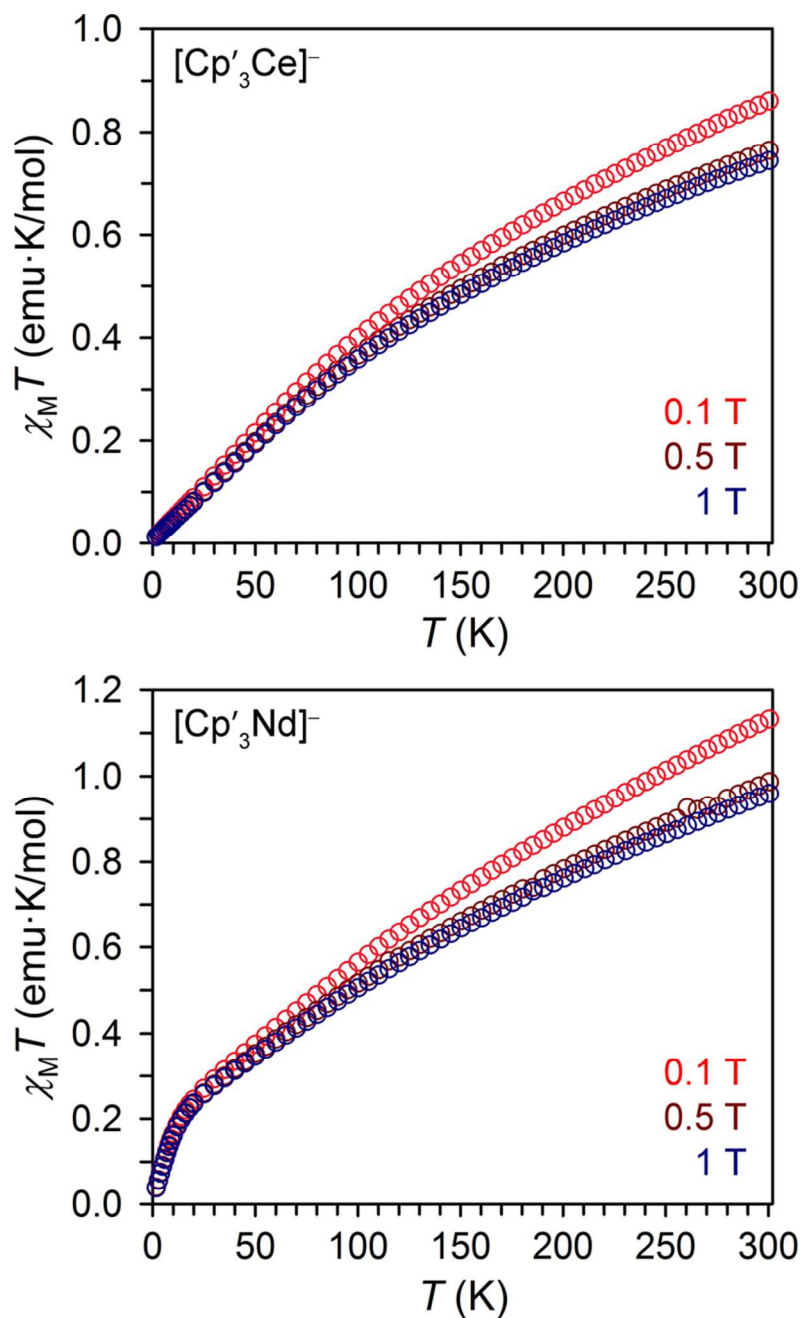

**Figure S7.** Plot of the magnetic susceptibility times temperature ( $\chi_M T$ ) versus temperature for  $[\text{K}(\text{crypt-222})][\text{Cp}'_3\text{Ce}]$  (top) and  $[\text{K}(\text{crypt-222})][\text{Cp}'_3\text{Nd}]$  (bottom) collected at fields of 0.1 T, 0.5 T, and 1 T (red, dark red, and dark blue circles, respectively).
